# Supplementary material
Source: PubMed Central journal article supplement (PMC4333478)
Supplement: IAI.02601-14_zii999091113so1.pdf [file IAI.02601-14_zii999091113so1.pdf]

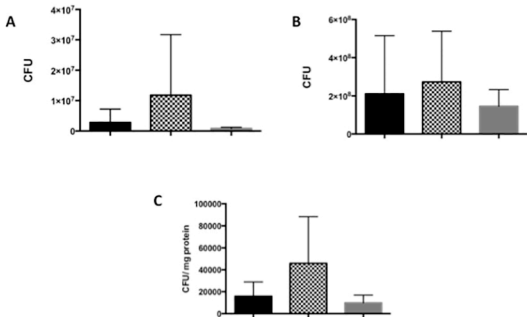

Fig S1 shows the results of cultural studies at day 4 of quantitative nasopharyngeal cultures (panel A), middle ear taps at day 4 (panel B) and biofilm/mucosa cultures (panel C). The black bar shows results of wildtype infection, the hatched bar shows the results of *nuc* infection and the grey columns show infection due to the complemented mutant. Using ANOVA analysis. None of these cultures showed significant differences.
